# Supplementary material
Source: PubMed Central journal article supplement (PMC5865027)
Supplement: IAI.00758-17_zii999092347s1.pdf [file IAI.00758-17_zii999092347s1.pdf]

## Supplemental Figure 1

A

Control Strains

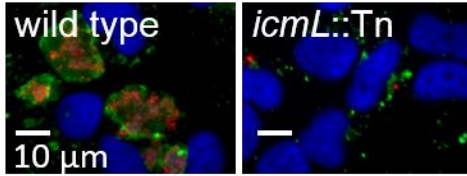

Group 1

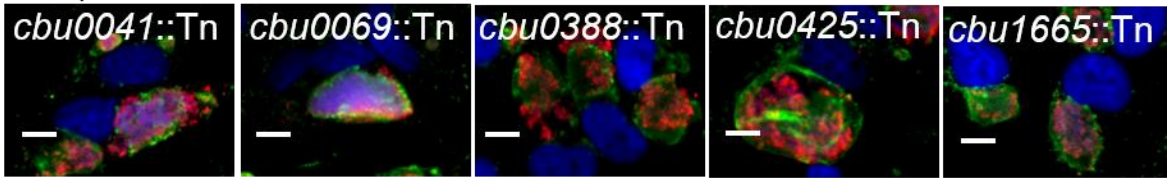

Group 2

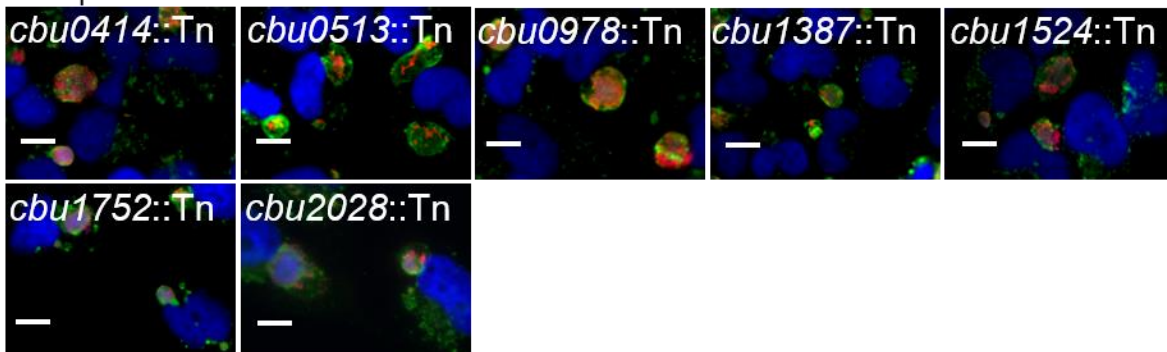

B

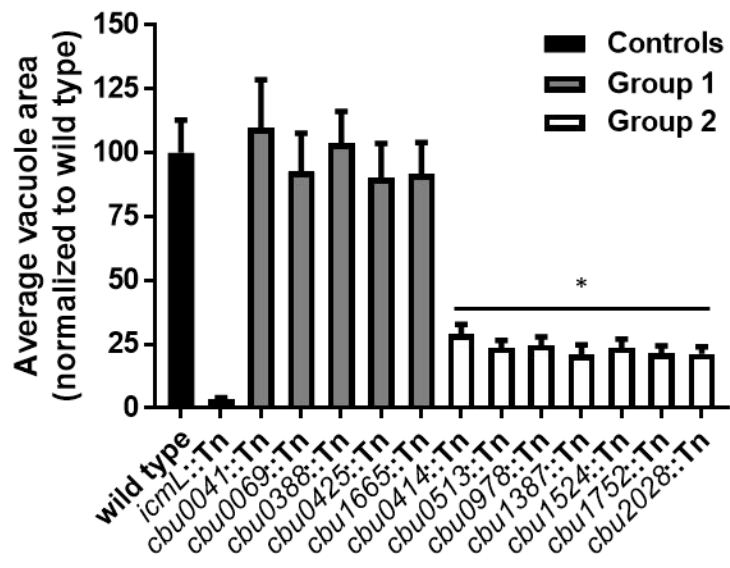

**Fig. S1. CCV biogenesis phenotypes displayed after low MOI infection.** HeLa cells were infected at an MOI of one and were analyzed five days post-infection. (A) The parental NMII strain (wild type) and a *Dot/Icm*-deficient *icmL::Tn* mutant were used as a positive and negative controls for CCV biogenesis, respectively. The previously described effector mutants in Group 1 displayed vacuoles that were equivalent in size to the vacuoles containing the NMII strain. The seven effector mutants described in this study were in Group 2, and the vacuoles displayed by these mutants were all reduced in size relative to the NMII-containing vacuoles, but larger than the vacuoles containing the *icmL::Tn* mutant. (B) Average vacuole area was determined for each mutant by averaging the size of all CCVs in the infected cells of eight random images acquired for each strain at 600X magnification. \*, P-value < 0.001 indicate a significant difference in vacuole size compared to the size of vacuoles created by both the control NMII strain and the control *icmL::Tn* mutant strain as determined by Student's t-test.

## Supplemental Figure 2

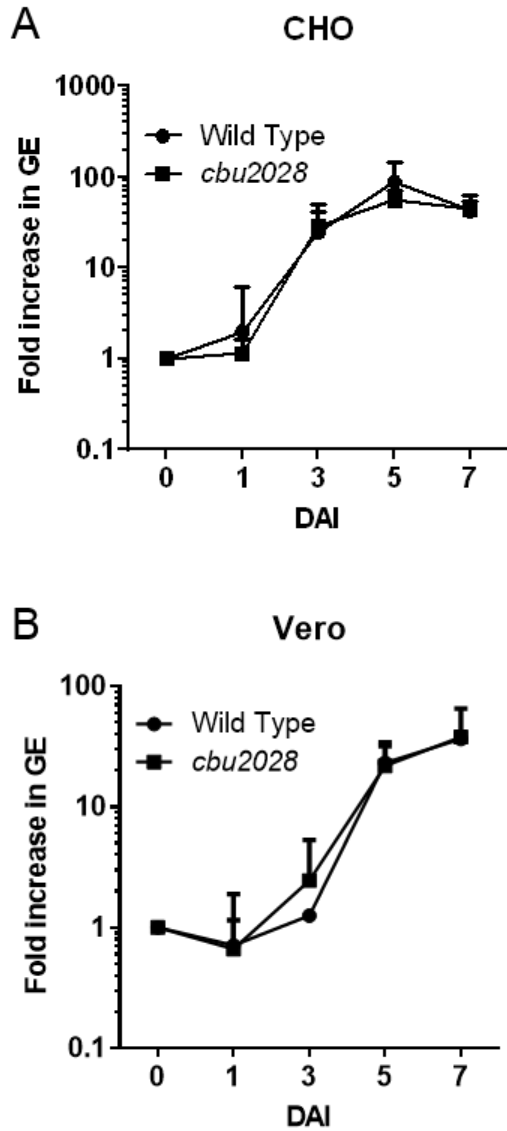

**Fig. S2. Intracellular replication kinetics of *cbu2028*::Tn in CHO and Vero cells.** Intracellular replication over a seven day time period was determined by fold-increase in genomic equivalents relative to the first day of infection (DAI=0). Intracellular replication for the parental NMII strain (Wild Type, circle), the *cbu2028*::Tn mutant (square), are shown for (A) CHO cells and (B) Vero cells.

Supplemental Table 1

| Effector Gene  | Gene Name            | Genomic Insertion Site(s) (NC_002971.3) | CCV phenotype relative to wild type |
|----------------|----------------------|-----------------------------------------|-------------------------------------|
| <i>cbu0012</i> |                      | 12286                                   | no difference                       |
| <i>cbu0021</i> | <i>cig2, cvpB</i>    | 19192; 19280                            | multi-vacuolar                      |
| <i>cbu0041</i> | <i>cirA, coxCC1</i>  | 38223; 39905                            | no difference*                      |
| <i>cbu0048</i> |                      | 45802; 45910                            | no difference                       |
| <i>cbu0049</i> |                      | 46672; 46994                            | no difference                       |
| <i>cbu0062</i> | <i>cem1</i>          | 56843                                   | no difference                       |
| <i>cbu0069</i> | <i>ankP</i>          | 63560; 64162                            | no difference*                      |
| <i>cbu0072</i> | <i>ankA</i>          | 65711; 66529                            | no difference                       |
| <i>cbu0122</i> |                      | 111925                                  | no difference                       |
| <i>cbu0128</i> |                      | 117057; 116556                          | no difference                       |
| <i>cbu0129</i> | <i>coxCC2</i>        | 116697; 116719                          | no difference                       |
| <i>cbu0144</i> | <i>ankB</i>          | 132025; 131885                          | no difference                       |
| <i>cbu0295</i> |                      | 262533; 262532                          | no difference                       |
| <i>cbu0344</i> |                      | 312064; 312062                          | no difference                       |
| <i>cbu0388</i> |                      | 352392                                  | no difference*                      |
| <i>cbu0393</i> |                      | 357149                                  | no difference                       |
| <i>cbu0414</i> | <i>coxH1</i>         | 369171                                  | small                               |
| <i>cbu0425</i> | <i>cirB</i>          | 377489                                  | no difference*                      |
| <i>cbu0447</i> | <i>ankF</i>          | 394134                                  | no difference                       |
| <i>cbu0513</i> |                      | 453570                                  | small                               |
| <i>cbu0534</i> |                      | 479403; 479397                          | no difference                       |
| <i>cbu0781</i> | <i>ankG</i>          | 722990                                  | no difference                       |
| <i>cbu0885</i> | <i>cetCb4</i>        | 837619                                  | no difference                       |
| <i>cbu0937</i> | <i>cirC, coxDFB1</i> | 887774; 887017                          | small                               |
| <i>cbu0978</i> | <i>cem3</i>          | 930641                                  | small                               |
| <i>cbu1043</i> | <i>gacA.4</i>        | 984953; 985088                          | no difference                       |
| <i>cbu1063</i> | <i>cem4</i>          | 1008750                                 | no difference                       |
| <i>cbu1079</i> |                      | 1023981; 1023913                        | no difference                       |
| <i>cbu1110</i> |                      | 1056726                                 | no difference                       |
| <i>cbu1198</i> |                      | 1142539                                 | no difference                       |
| <i>cbu1217</i> | <i>coxU2</i>         | 1163535; 1162531                        | no difference                       |
| <i>cbu1251</i> |                      | 1202529                                 | no difference                       |
| <i>cbu1292</i> | <i>ankK</i>          | 1246725; 1246917                        | no difference                       |
| <i>cbu1379</i> | <i>coxK2</i>         | 1328215                                 | no difference                       |
| <i>cbu1387</i> | <i>cem6</i>          | 1337685                                 | small                               |
| <i>cbu1406</i> | <i>coxDFB3</i>       | 1358424                                 | no difference                       |
| <i>cbu1457</i> | <i>coxTPR1</i>       | 1410662                                 | no difference                       |

|                |                       |                  |                |
|----------------|-----------------------|------------------|----------------|
| <i>cbu1461</i> | <i>coxCC8</i>         | 1417098; 1417177 | small          |
| <i>cbu1524</i> | <i>caeA</i>           | 1475299          | no difference  |
| <i>cbu1525</i> |                       | 1475299          | no difference  |
| <i>cbu1530</i> |                       | 1481087          | no difference  |
| <i>cbu1566</i> |                       | 1514458          | no difference  |
| <i>cbu1569</i> | <i>coxCC12</i>        | 1516828; 1517306 | no difference  |
| <i>cbu1576</i> |                       | 1523162; 1524222 | no difference  |
| <i>cbu1599</i> | <i>coxCC13</i>        | 1545143          | no difference  |
| <i>cbu1634</i> | <i>cem8</i>           | 1575307          | no difference  |
| <i>cbu1636</i> | <i>coxCC14, cig55</i> | 1576055; 157917  | no difference  |
| <i>cbu1639</i> |                       | 1579591, 1579074 | no difference  |
| <i>cbu1665</i> |                       | 1601500          | no difference* |
| <i>cbu1677</i> |                       | 1611159          | no difference  |
| <i>cbu1699</i> |                       | 1632356; 1632105 | no difference  |
| <i>cbu1724</i> |                       | 1658482          | no difference  |
| <i>cbu1751</i> | <i>cig57</i>          | 1682157; 1682180 | small          |
| <i>cbu1752</i> |                       | 1683656; 1683656 | small          |
| <i>cbu1754</i> |                       | 1684955; 1685031 | small          |
| <i>cbu1757</i> | <i>ankM, cig58</i>    | 1687615; 1688124 | no difference  |
| <i>cbu1769</i> | <i>coxH3</i>          | 1700167          | no difference  |
| <i>cbu1780</i> |                       | 1708652; 1709402 | no difference  |
| <i>cbu1789</i> |                       | 1721435; 1721437 | no difference  |
| <i>cbu1802</i> |                       | 1735650          | no difference  |
| <i>cbu2007</i> | <i>cem12</i>          | 1913579; 1913478 | no difference  |
| <i>cbu2013</i> | <i>cem13</i>          | 1920462          | no difference  |
| <i>cbu2028</i> |                       | 1935712; 1935580 | small          |
| <i>cbu2052</i> | <i>cirD</i>           | 1958215; 1958615 | no difference  |
| <i>cbu2056</i> |                       | 1962315; 1962702 | no difference  |
| <i>cbu2064</i> |                       | 1968966          | no difference  |
| <i>cbu2069</i> |                       | 1973680          | no difference  |
| <i>cbu2076</i> |                       | 1978466; 1978391 | no difference  |
| <i>cbu2078</i> | <i>coxFIC1</i>        | 1980054; 1979704 | no difference  |

\* Mutants with transposon insertions in these genes were reported previously (15, 17) to have severe intracellular replication defects that were not detectable in this screen with this mutant library.

## Supplemental Table 2

| <b>Primer Name</b>                | <b>Primer Sequence</b>                                                                       | <b>Primer features</b>     |
|-----------------------------------|----------------------------------------------------------------------------------------------|----------------------------|
| Partially complementary adapter 1 | AGTTCTCCAGGTCTTGCGTTGCTCTTCCGATC*T                                                           | *Phosphothiorate linkage   |
| Partially complementary adapter 2 | GATCGGAAGAGCTCGTATGCCGTCTTCTGCTTG                                                            | 5' phosphorylation         |
| Universal adapter                 | CAAGCAGAAGACGGCATAACGAGCTCTTCCGATC*T                                                         | *Phosphothiorate linkage   |
| Barcode primers                   | AATGATACGGCGACCACCGAGATCTACACTCTTTC<br>CCTACACGACGCTCTTCCGATCTNNNNNNCGGGG<br>ACTTATCAGCCAACC | NNNNNN =<br>unique barcode |
| Barcode1                          | AAACAC                                                                                       |                            |
| Barcode2                          | TGAAGG                                                                                       |                            |
| Barcode3                          | AACATA                                                                                       |                            |
| Barcode4                          | CGCGTC                                                                                       |                            |
| Barcode5                          | GATACA                                                                                       |                            |
| Barcode6                          | GGTGTG                                                                                       |                            |
| Barcode7                          | TAAGAA                                                                                       |                            |
| Barcode8                          | AGCGAG                                                                                       |                            |
| Barcode9                          | CGGTTA                                                                                       |                            |
| Barcode10                         | AGCTTT                                                                                       |                            |
| Barcode11                         | TGGTCT                                                                                       |                            |
| Barcode12                         | TATCCC                                                                                       |                            |
| Barcode13                         | TGTCGT                                                                                       |                            |
| Barcode14                         | CCCCAC                                                                                       |                            |
| Barcode15                         | ATACGA                                                                                       |                            |
| Barcode16                         | CCCTTG                                                                                       |                            |
| Barcode17                         | ACCGGC                                                                                       |                            |
| Barcode18                         | TTACTG                                                                                       |                            |
| Barcode19                         | GGAACT                                                                                       |                            |
| Barcode20                         | GTTATT                                                                                       |                            |
| Barcode21                         | AAAAGT                                                                                       |                            |
| Barcode22                         | AAGGGA                                                                                       |                            |
| Barcode23                         | AAGTAT                                                                                       |                            |
| Barcode24                         | ACATCT                                                                                       |                            |
